# Supplementary material
Source: PubMed Central journal article supplement (PMC2997152)
Supplement: NIHMS249085-supplement-supplement_1.pdf [file NIHMS249085-supplement-supplement_1.pdf]

## DMP-777

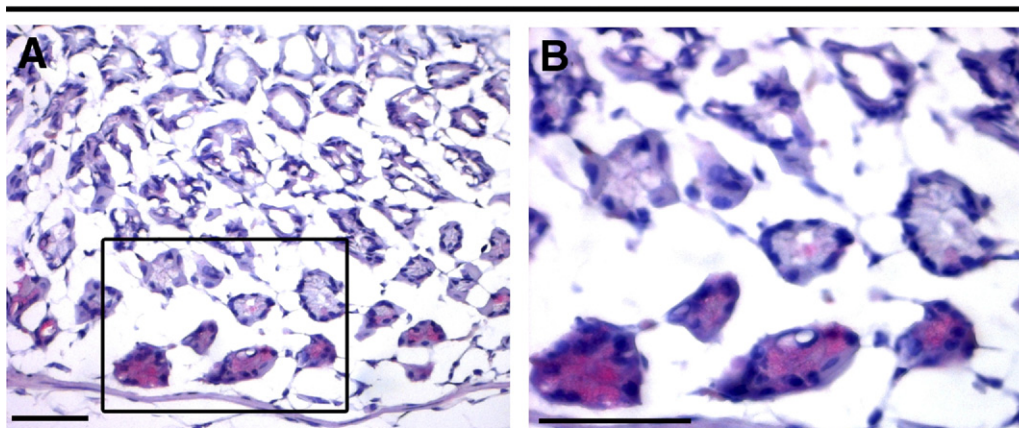

## L-635

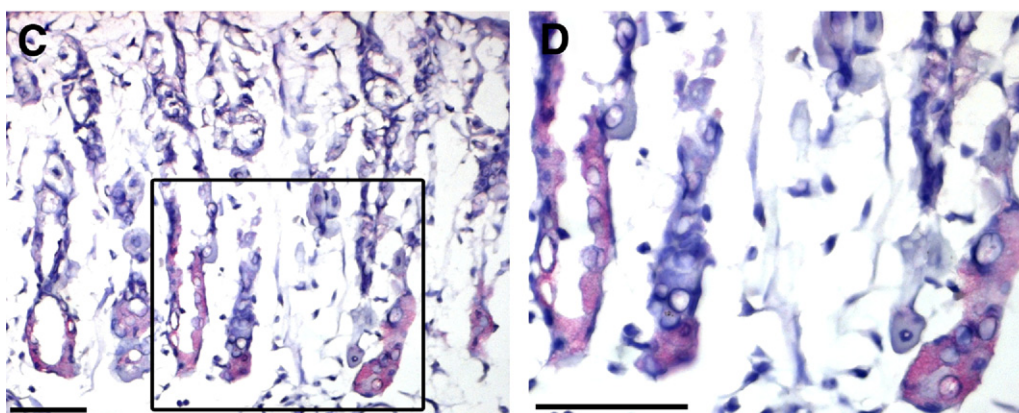

**Supplementary Figure 1.** Expression of  $\beta$ -galactosidase in  $Mist1^{CreER/+}/Rosa26R^{LacZ}$  mice treated with DMP-777 and L-635. To identify expression of  $\beta$ -galactosidase protein in  $Mist1^{CreER/+}/Rosa26R^{LacZ}$  mice after treatment with DMP-777 and L-635, we immunostained gastric tissues with antibodies against  $\beta$ -galactosidase (Vector Red staining). (A) In DMP-777-treated mice, we observed  $\beta$ -galactosidase expression at the bases of fundic glands. (B) Higher magnification view of panel A. (C) As seen with X-gal staining,  $\beta$ -galactosidase expression was observed in L-635-treated mice along the entire gland length. (D) Higher magnification view of panel C. Bar, 50  $\mu$ m.

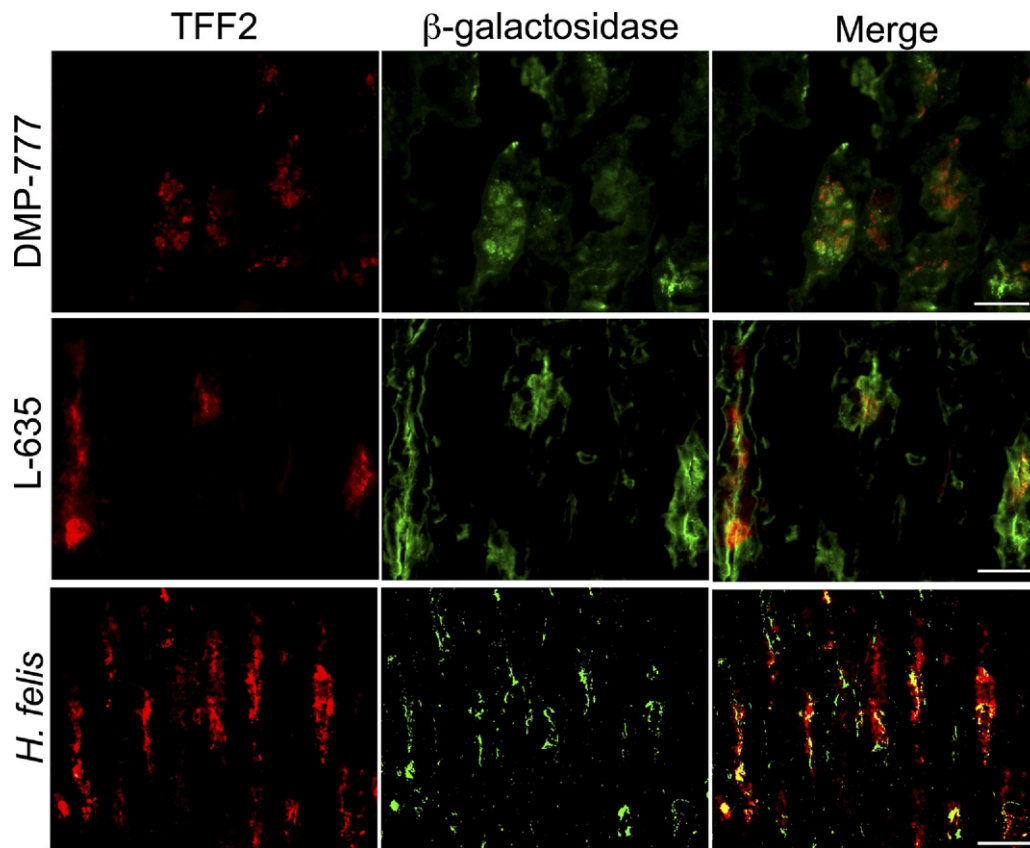

**Supplementary Figure 2.** Dual immunostaining for TFF2 (red) and bacterial  $\beta$ -galactosidase (green) in mouse models of metaplasia. *Mist1*<sup>CreER/+</sup>/*Rosa26R*<sup>LacZ</sup> mice were treated with 3 doses of tamoxifen to induce  $\beta$ -galactosidase expression in mature chief cells and after a 10-day, drug-free interval, metaplasia was induced with 3 different protocols: 14 days of DMP-777, 3 days of L-635, or 6 months' infection with *H. felis*. Frozen sections of gastric fundus were dual immunostained for TFF2 (red) and bacterial  $\beta$ -galactosidase (green). A dual staining overlay is shown at the right. Bar, 50  $\mu$ m.



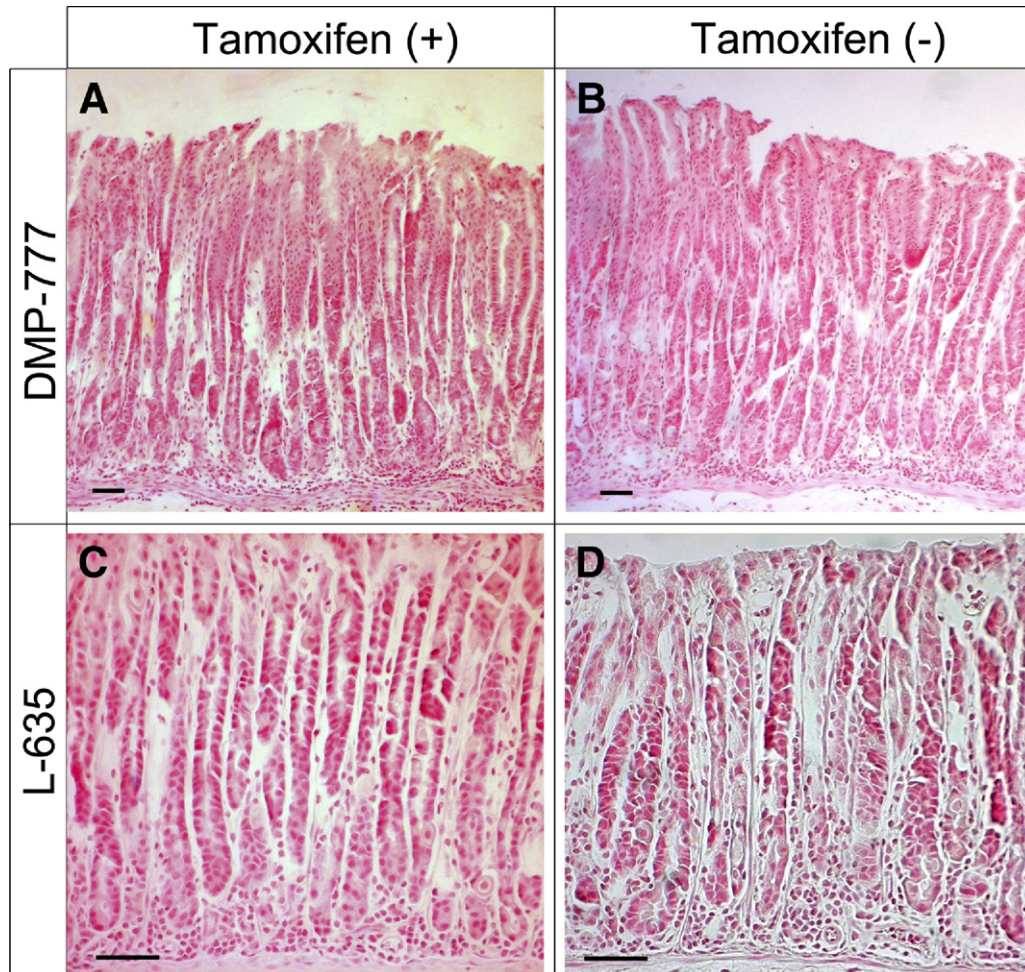

**Supplementary Figure 3.** No expression of  $\beta$ -galactosidase in *Rosa26R<sup>LacZ</sup>* mice treated with DMP-777 and L-635 without or with tamoxifen treatment. To confirm whether endogenous  $\beta$ -galactosidase activity was induced in *Rosa26R<sup>LacZ</sup>* mice after treatment with DMP-777 ( $n = 2$ ) and L-635 ( $n = 2$ ), we evaluated the  $\beta$ -galactosidase activity by incubation of tissue from mice that either never received tamoxifen ( $n = 2$ ) or were treated with 3 doses of tamoxifen ( $n = 2$ ).  $\beta$ -galactosidase activity was visualized by incubation of stomachs with X-gal followed by paraffin-embedding and sectioning. No  $\beta$ -galactosidase expression was observed in the entire stomach including fundic glands after treatment with either (A and B) DMP-777 or (C and D) L-635. Bar, 50  $\mu$ m.

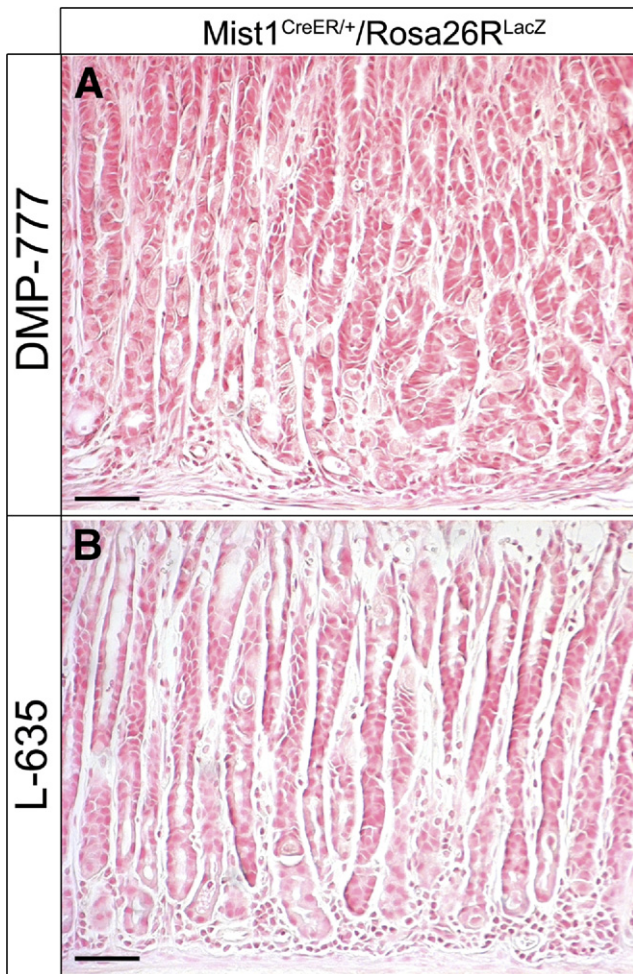

**Supplementary Figure 4.** No expression of  $\beta$ -galactosidase in Mist1<sup>CreER/+</sup>/Rosa26R<sup>LacZ</sup> mice treated with DMP-777 and L-635 without tamoxifen treatment. To confirm whether endogenous  $\beta$ -galactosidase activity was induced in Mist1<sup>CreER/+</sup>/Rosa26R<sup>LacZ</sup> mice after treatment with DMP-777 (n = 2) and L-635 (n = 2), we evaluated the  $\beta$ -galactosidase activity by incubation of tissue from mice that never received tamoxifen.  $\beta$ -galactosidase activity was visualized by incubation of stomachs with X-gal followed by paraffin-embedding and sectioning. No  $\beta$ -galactosidase expression was observed in the entire stomach including fundic glands after treatment with either (A) DMP-777 or (B) L-635. Bar, 50  $\mu$ m.

761  
762  
763  
764  
765  
766  
767  
768  
769  
770  
771  
772  
773  
774  
775  
776  
777  
778  
779  
780  
781  
782  
783  
784  
785



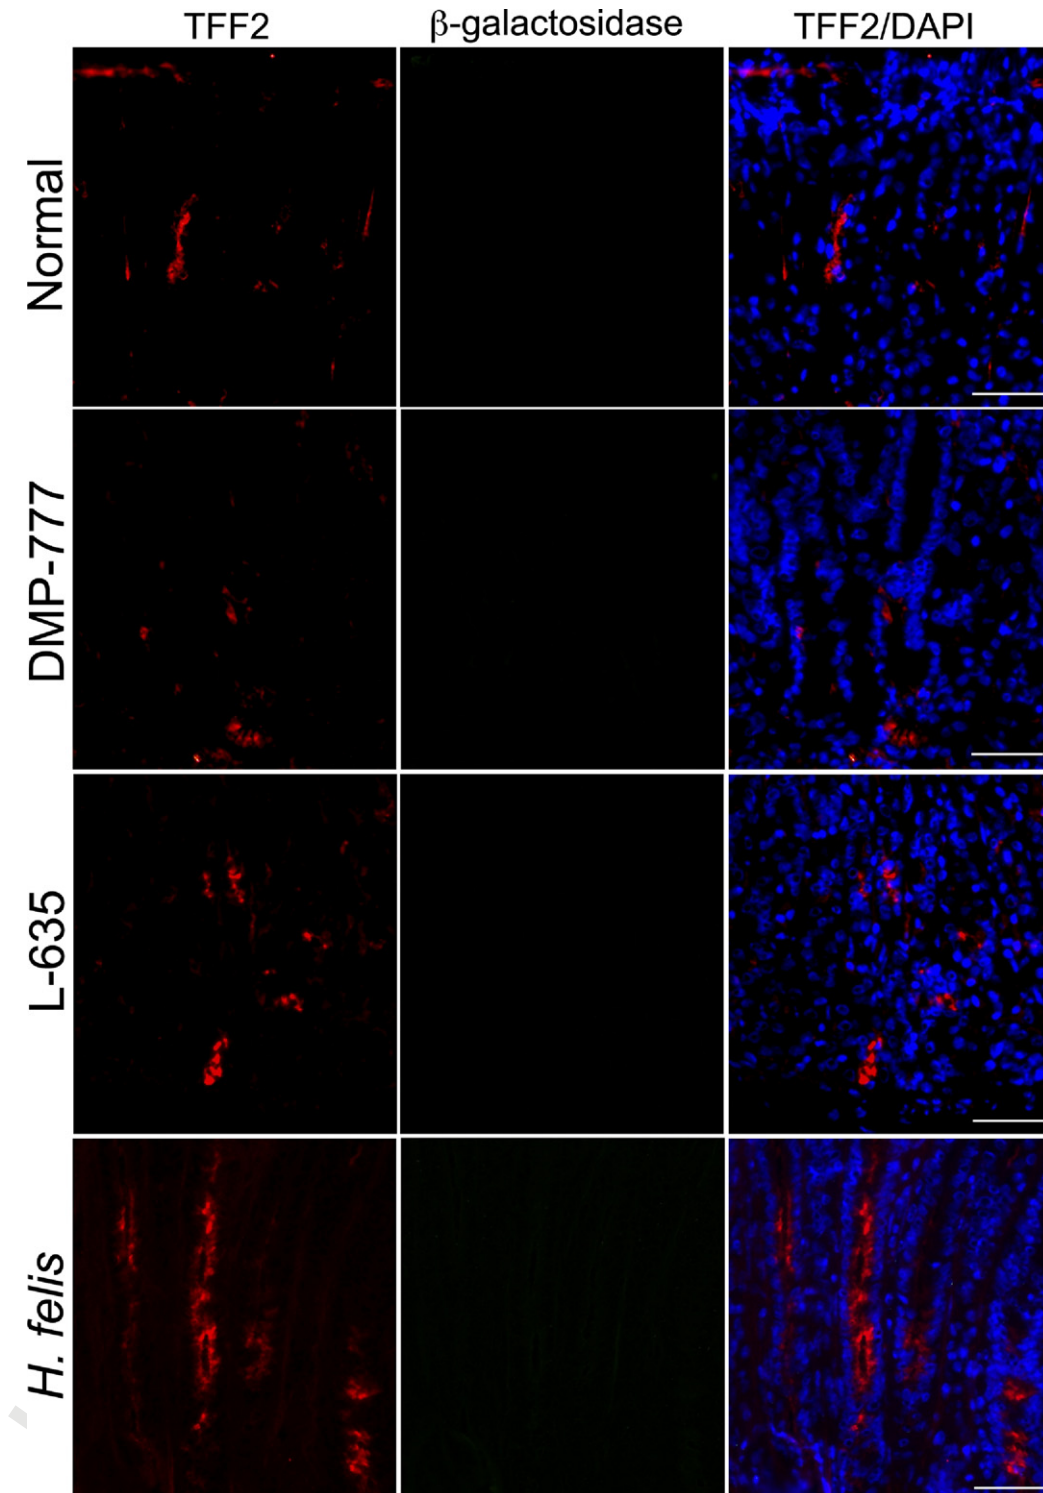

**Supplementary Figure 5.** Induction of SPEM in mice does not induce spurious  $\beta$ -galactosidase immunostaining. Mice were maintained either without treatment (normal) or were treated with 14 days of DMP-777 ( $n = 2$ ), 3 days of L-635 ( $n = 2$ ), or 6 months' infection with *H. felis* ( $n = 2$ ). Frozen sections of gastric fundus were dual immunostained for TFF2 (red) and bacterial  $\beta$ -galactosidase (green). A dual staining overlay of TFF2 and 4,6-diamidino-2-phenylindole (DAPI) is shown at the right. No immunostaining for  $\beta$ -galactosidase was observed in gastric sections with any treatment protocol. Bar, 50  $\mu$ m.

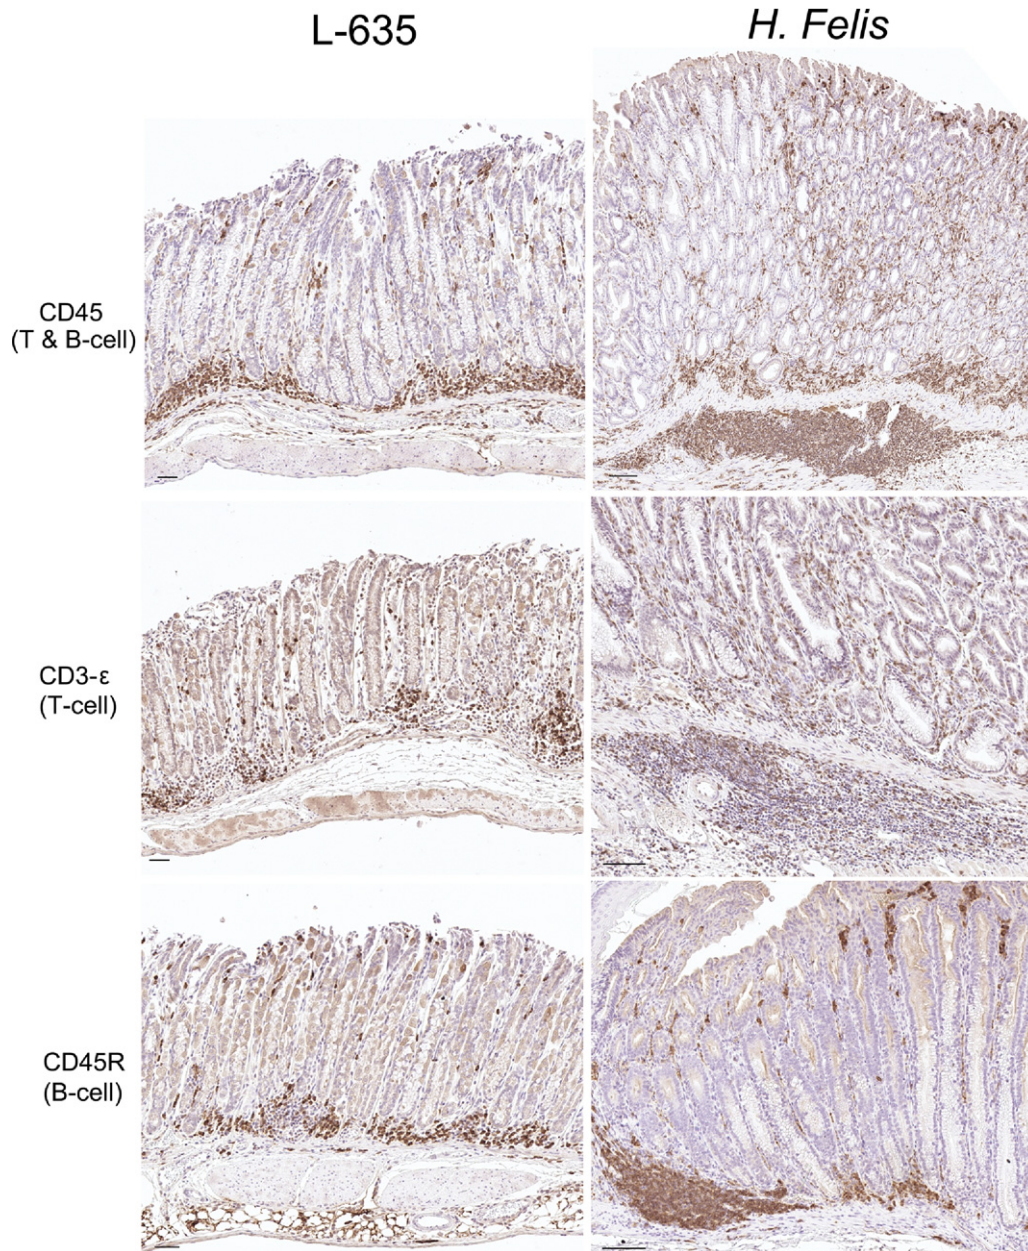

**Supplementary Figure 6.** Characterization of infiltrating inflammatory cells in SPEM models with inflammation using lymphocyte cell-surface antigen markers restricted to the T- and B-cell lineage. In sections of mouse stomachs from L-635-treated or *H. felis*-infected mice, general lymphocyte staining of both B and T cells was determined with CD45 immunostaining (a general immune cell marker), T-cell-specific staining was performed for CD3-ε and B-cell-specific staining was performed with antibodies against CD45R. Both T-cell and B-cell staining was observed in both SPEM models with inflammation in the mucosa as well as in the submucosa. Bar, 50 μm.



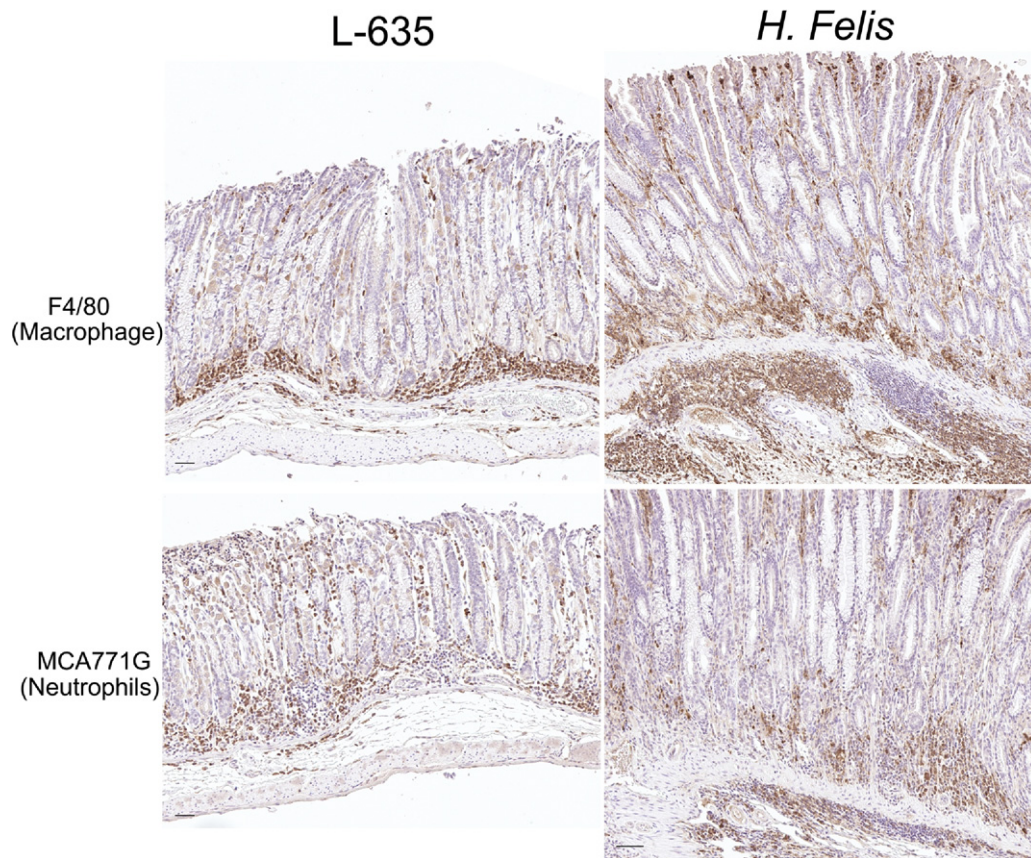

**Supplementary Figure 7.** Characterization of infiltrating inflammatory cells in SPEM models using macrophage and neutrophil markers. In sections of mouse stomachs from L-635-treated or *H. felis*-infected mice, immunostaining was performed for F4/80, a macrophage-restricted cell surface glycoprotein antigen, and MCA771G, which recognizes a polymorphic antigen expressed by polymorphonuclear cells, but is absent on resident tissue macrophages. Both neutrophils and macrophages were observed within infiltrating inflammatory cells in both models. Bar, 50  $\mu\text{m}$ .

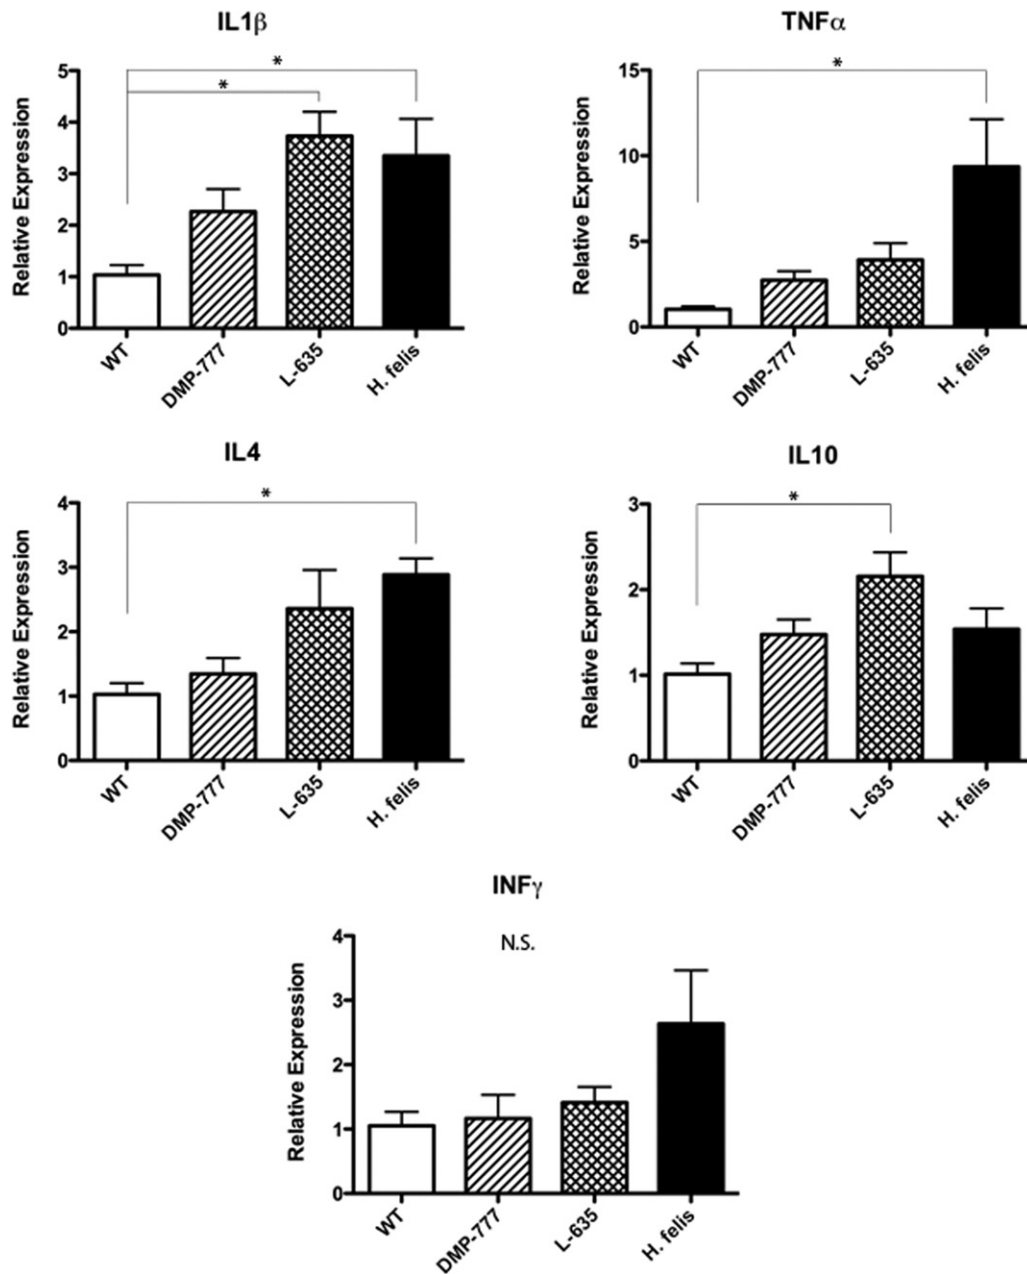

**Supplementary Figure 8.** Expression of cytokines in the gastric mucosa of L-635-treated and *H. felis*-infected mice. Transcript levels for tumor necrosis factor (TNF)- $\alpha$ , IL-1 $\beta$ , IL-4, IL-10, and interferon- $\gamma$  were determined by real-time PCR in fundic RNA samples isolated from untreated wild-type, DMP-777-treated, L-635-treated, and *H. felis*-infected mice ( $n = 3$  for all groups). Results are expressed as a ratio of the mean expression in wild-type mice ( $\pm$  standard error of the mean). \* $P < .05$  vs untreated wild-type mice.



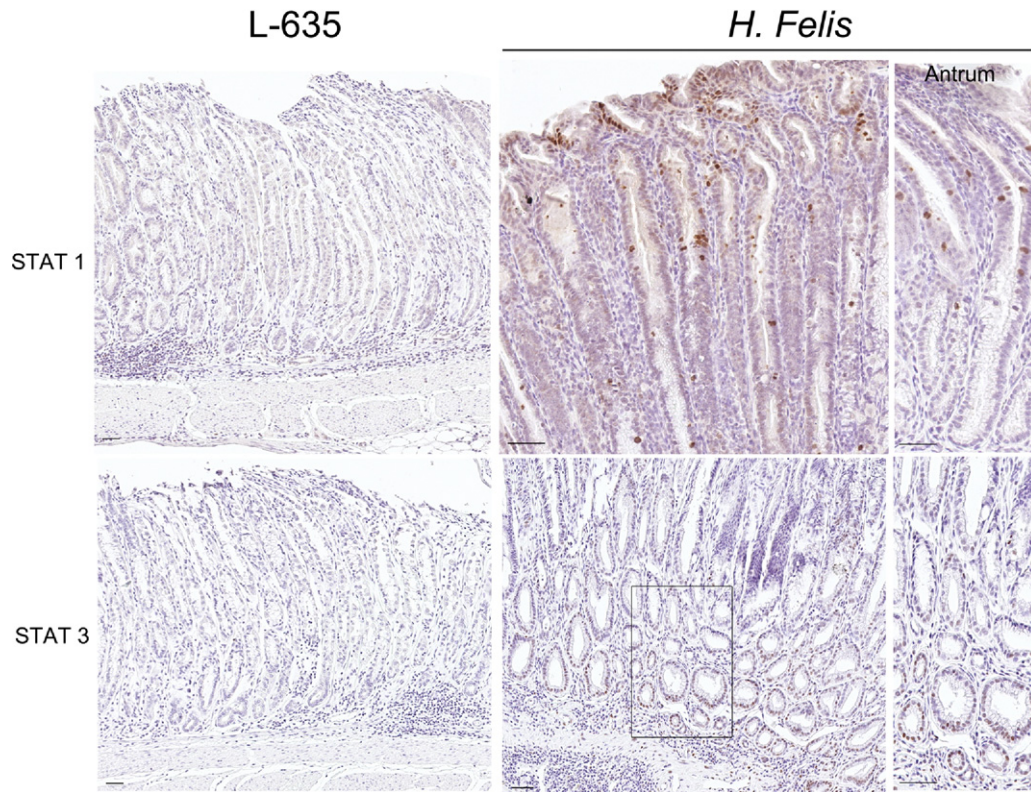

**Supplementary Figure 9.** The expression of cytokine receptor-associated transcription factor STATs. Sections of mouse stomachs from L-635-treated or *H felis*-infected mice were stained with antibodies against phospho-STAT1, phospho-STAT3, or phospho-STAT6. Although phospho-STAT1 and phospho-STAT3 were not activated in L-635-induced inflammatory cells, we observed activated STAT1 in both the fundus and antrum and phospho-STAT3 in the fundus in the *H felis*-infected mouse model. No phospho-STAT6 staining was observed in either model (data not shown). Bar, 50  $\mu$ m.
